# Supplementary material for: The demographics, clinical characteristics and quality of life of patients with chronic cough from the Isala Cough Clinic in the Netherlands
Source: PubMed Central journal article supplement — ERJ Open Res. 2022 Dec 12;8(4):00232-2022. doi: 10.1183/23120541.00232-2022 (PMC9835969; doi:10.1183/23120541.00232-2022), 2022-12-12
Supplement: 00232-2022.supplement.pdf [file 00232-2022.supplement.pdf]

Figure S1. Decision flow chart for including a patient in the study population.

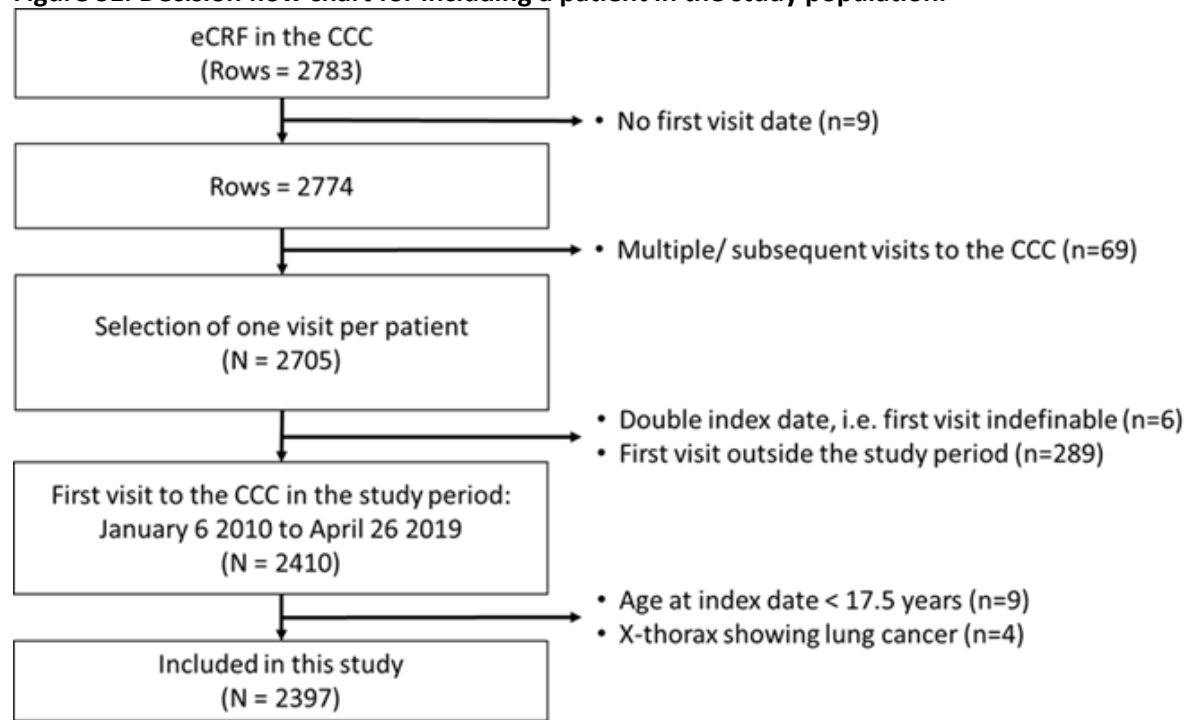

eCRF, electronic case record form; CCC, Chronic cough clinic.

**Table S1. Patient characteristics by presence of phenotype and treatment response.**

|                                   | Effective treatment           |                    |                                 |                    | Ineffective treatment               |                    |                                       |                    |
|-----------------------------------|-------------------------------|--------------------|---------------------------------|--------------------|-------------------------------------|--------------------|---------------------------------------|--------------------|
|                                   | Group 1 (n= 308)<br>Phenotype |                    | Group 2 (n= 65)<br>No phenotype |                    | Group 3 (n= 264)<br>Phenotype / RCC |                    | Group 4 (n= 67)<br>No phenotype / UCC |                    |
|                                   | n                             | Summary statistics | n                               | Summary statistics | n                                   | Summary statistics | n                                     | Summary statistics |
| <b>Demographic</b>                |                               |                    |                                 |                    |                                     |                    |                                       |                    |
| Age                               | 308                           | 59.9 (±13.0)       | 65                              | 63.9 (±11.9)       | 264                                 | 60.0 (±13.1)       | 67                                    | 64.5 (±11.6)       |
| Sex (woman)                       | 308                           | 182 (59.1%)        | 65                              | 35 (53.8%)         | 264                                 | 176 (66.7%)        | 67                                    | 40 (59.7%)         |
| Smoking status                    | 284                           |                    | 59                              |                    | 233                                 |                    | 56                                    |                    |
| - Non-smoker                      |                               | 167 (58.8%)        |                                 | 30 (50.8%)         |                                     | 135 (57.9%)        |                                       | 28 (50.0%)         |
| - Former                          |                               | 110 (38.7%)        |                                 | 26 (44.1%)         |                                     | 86 (36.9%)         |                                       | 27 (48.2%)         |
| - Current                         |                               | 7 (2.5%)           |                                 | 3 (5.1%)           |                                     | 12 (5.2%)          |                                       | 1 (1.8%)           |
| <b>Diagnostics</b>                |                               |                    |                                 |                    |                                     |                    |                                       |                    |
| X-thorax, % normal                | 308                           | 83.1%              | 62                              | 79%                | 263                                 | 85.2%              | 61                                    | 78.7%              |
| <b>UACS</b>                       |                               |                    |                                 |                    |                                     |                    |                                       |                    |
| X-sinus, % normal                 | 302                           | 78.5%              | 60                              | 100%               | 261                                 | 83.1%              | 56                                    | 100%               |
| <b>BHR/AL</b>                     |                               |                    |                                 |                    |                                     |                    |                                       |                    |
| Methacholine test, % normal       | 298                           | 42.6%              | 18                              | 100%               | 255                                 | 34.9%              | 17                                    | 100%               |
| FEV <sub>1</sub> (L)              | 298                           | 3.0 (±0.8)         | 62                              | 2.7 (±1.1)         | 255                                 | 2.8 (±0.8)         | 60                                    | 2.7 (±0.9)         |
| FEV <sub>1</sub> (%)              | 295                           | 98.2 (±15.3)       | 62                              | 85.7 (±25.2)       | 255                                 | 94.9 (±15.8)       | 60                                    | 92.1 (±23.0)       |
| VC (L)                            | 295                           | 4.0 (±1.0)         | 61                              | 3.7 (±1.4)         | 251                                 | 3.7 (±1.0)         | 59                                    | 3.6 (±1.1)         |
| VC (%)                            | 295                           | 102.1 (±14.6)      | 61                              | 92.0 (±21.0)       | 252                                 | 98.4 (±14.1)       | 57                                    | 95.8 (±18.6)       |
| FEV <sub>1</sub> (L)/ VC (L)      | 290                           | 75.5 (±7.9)        | 61                              | 72.1 (±12.0)       | 243                                 | 75.1 (±7.5)        | 58                                    | 73.9 (±10.1)       |
| FEV <sub>1</sub> (L)/ VC (L) < 70 | 290                           | 60 (20.7%)         | 61                              | 20 (32.8%)         | 243                                 | 56 (23.0%)         | 58                                    | 13 (22.4%)         |
| <b>Airway reflux</b>              |                               |                    |                                 |                    |                                     |                    |                                       |                    |
| HARQ-total                        | 285                           | 32.0 (±11.3)       | 50                              | 29.4 (±15.5)       | 250                                 | 35.5 (±14.2)       | 60                                    | 30.9 (±16.1)       |
| HARQ-total ≥ 14                   | 285                           | 271 (95.1%)        | 50                              | 37 (74.0%)         | 250                                 | 234 (93.6%)        | 60                                    | 45 (75.0%)         |
| <b>Other</b>                      |                               |                    |                                 |                    |                                     |                    |                                       |                    |
| FeNO-measurement result           | 277                           | 21.0 (14.0 – 35.5) | 51                              | 21 (13.0 – 37.0)   | 228                                 | 15.0 (10.0 – 23.8) | 49                                    | 20 (11.5 – 24.5)   |
| Allergy testing                   | 296                           | 77 (26.0%)         | 61                              | 18 (29.5%)         | 255                                 | 63 (24.7%)         | 62                                    | 12 (19.4%)         |
| IgE >120                          | 284                           | 59 (20.8%)         | 61                              | 14 (23.0%)         | 249                                 | 40 (16.1%)         | 62                                    | 8 (12.9%)          |
| EO's >0.4                         | 296                           | 18 (6.1%)          | 62                              | 6 (9.7%)           | 261                                 | 17 (6.5%)          | 62                                    | 3 (4.8%)           |
| <b>Diagnosis groups</b>           |                               |                    |                                 |                    |                                     |                    |                                       |                    |
| BHR/AL                            | 294                           | 187 (63.6%)        | 17                              | 0 (0.0%)           | 249                                 | 179 (71.9%)        | 15                                    | 0 (0.0%)           |
| UACS                              | 302                           | 65 (21.5%)         | 60                              | 0 (0.0%)           | 261                                 | 44 (16.9%)         | 56                                    | 0 (0.0%)           |
| Airway Reflux                     | 270                           | 97 (35.9%)         | 8                               | 0 (0.0%)           | 238                                 | 70 (29.4%)         | 7                                     | 0 (0.0%)           |

|                  | Effective treatment           |                                     |                                 |                               | Ineffective treatment               |                                     |                                       |                               |
|------------------|-------------------------------|-------------------------------------|---------------------------------|-------------------------------|-------------------------------------|-------------------------------------|---------------------------------------|-------------------------------|
|                  | Group 1 (n= 308)<br>Phenotype |                                     | Group 2 (n= 65)<br>No phenotype |                               | Group 3 (n= 264)<br>Phenotype / RCC |                                     | Group 4 (n= 67)<br>No phenotype / UCC |                               |
|                  | n                             | Summary statistics                  | n                               | Summary statistics            | n                                   | Summary statistics                  | n                                     | Summary statistics            |
| Diagnosis number | 308                           | 0 (0%)<br>267 (86.7%)<br>41 (13.3%) | 65                              | 65 (100%)<br>0 (0%)<br>0 (0%) | 264                                 | 0 (0%)<br>235 (89.0%)<br>29 (11.0%) | 67                                    | 67 (100%)<br>0 (0%)<br>0 (0%) |
| - 0              |                               |                                     |                                 |                               |                                     |                                     |                                       |                               |
| - 1              |                               |                                     |                                 |                               |                                     |                                     |                                       |                               |
| - 2              |                               |                                     |                                 |                               |                                     |                                     |                                       |                               |

AL, airway limitation; BHR, bronchial hyperresponsiveness; HARQ, Hull airways reflux cough questionnaire; IgE, immunoglobulin E; FEV<sub>1</sub>, forced expiratory volume in 1 second; VC, vital capacity; FeNO, fractional exhaled nitric oxide; UACS, upper airway cough syndrome.
